# Supplementary material for: Can Psychotherapy Trainees Distinguish Standardized Patients From Real Patients?
Source: Atypon-hosted journal article supplement (doi:10.1026/1616-3443/a000594), 2020-07-01
Supplement: 1616-3443_a000594_esm1.pdf [file 1616-3443_a000594_esm1.pdf]

## Rollenanleitung

**Titel:** Depressive Patientin

**Name, Geschlecht:** Frau Schwarz, weiblich

**Alter:** 19 Jahre

**Äußeres Erscheinungsbild:** Jugendliches Auftreten, wirkt verunsichert.

**Persönlichkeit:** Sie sind eher ruhig, aber haben gern Kontakt zu Menschen und sind gern in Gesellschaft. Sie sind spontan und planen nicht weit im Voraus. In letzter Zeit planen Sie eigentlich gar nichts mehr und verbringen den Großteil Ihrer Zeit zu Hause. Momentan haben Sie keinen Job und Ihre Aktivitäten haben in letzter Zeit stark nachgelassen. Sie sind unglücklich, weil Ihnen Ihre gewohnten Hobbies keine Freude mehr bereiten. Für Unternehmungen fehlen Ihnen Motivation und Antrieb. Sie sind unglaublich niedergeschlagen und grübeln nur noch vor sich hin.

**Aktuelle soziale und berufliche Situation:** Nach dem Abitur im letzten Jahr immer noch unentschlossen, wie es weitergeht; ledig; wohnt bei den Eltern; jobbt unregelmäßig.

**Ort des Gesprächs:** Therapiezimmer

**Dauer:** ca. 20 Minuten

**Situationsbeschreibung:** Es gab bereits Termine mit Ihrem Therapeuten, v.a. zur Diagnosestellung und zum Vereinbaren eines Behandlungsplans. Im aktuellen Gespräch geht es um Ihr starkes Grübeln, und darum, welche Gedanken Sie in konkreten, als negativ empfundenen Situationen belasten. Es geht außerdem darum, wie Sie mit solchen Gedanken konstruktiv umgehen können. Der Therapeut beginnt das Gespräch. Er kennt Ihren Namen und Ihr Alter.

**Aufgabe:** Der Therapeut soll mit Ihnen besprechen, welche belastenden Gedanken in konkreten Situationen auftreten, wie diese mit Ihrer Stimmung zusammenhängen und wie Sie sie besser erkennen können.

**Konkrete Situationen, in denen belastende Gedanken auftreten:** Wenn Sie darüber nachdenken, wie Ihre Zukunft aussehen könnte, denken Sie „Ich hab keine Ahnung, was ich machen soll.“; „Ich schaffe es sowieso nicht.“; „Ich bin zu nichts zu gebrauchen.“; „Ich weiß überhaupt nicht, was ich will.“; „Ich werde niemals etwas erreichen.“

Wenn Freunde Sie fragen, ob Sie etwas gemeinsam unternehmen wollen und Sie wiederholt absagen, denken Sie „Das bringt ja alles doch nichts.“; „Niemand interessiert sich wirklich für mich.“; „Das wird nie mehr besser.“; „Ich will niemandem zur Last fallen.“; „Ich möchte ihnen nicht ihre schöne Zeit versauen.“

Anfangs sind Sie von der unumstößlichen Echtheit dieser Gedanken überzeugt. Auf Bitten des Therapeuten, Belege für diese Gedanken anzuführen, tun Sie sich zunächst schwer. Auf Initiative des Therapeuten sind Sie offen für alternative Sichtweisen und das Überprüfen Ihrer Gedanken.

**Beispielsituation:** Während Sie mit Ihrem Hund draußen waren, trafen Sie zufällig einen Schulfreund. Er sprach Sie an und erzählte ungefragt ausgiebig von der Ausbildung, die er vor einigen Wochen begonnen hat. Sie fühlten sich augenblicklich beschämt und dachten, Sie werden nie so erfolgreich sein wie er. Als der Freund Sie nach Ihren aktuellen Lebensumständen fragte, wichen Sie aus Scham mit Ihrer Antwort aus. Aus Termingründen verabschiedete sich Ihr Freund, ohne eine weitere Nachfrage zu stellen. Sie dachten, dass sich niemand richtig für Sie interessiere. Während des Heimwegs grübelten Sie lange, dass Sie zu nichts zu gebrauchen seien und in der Zukunft sowieso nichts schaffen würden.

**Körpersprache:** Ihr Gesichtsausdruck ist niedergeschlagen und nachdenklich. Ihre Körperhaltung ist zusammengesunken.

## Krankengeschichte

**Hauptbeschwerde:** Nach dem Abitur im letzten Jahr haben Sie verschiedene Gelegenheitsjobs (bspw. in einer Bar, als Hausaufgabenbetreuung) angenommen, um Geld zu verdienen. Inzwischen haben sich die meisten Ihrer Freunde für eine Ausbildung oder ein Studium entschieden. Sie fühlen sich unter Druck gesetzt, sich ebenso für einen Karriereweg zu entscheiden. Jedoch fällt Ihnen diese Entscheidung sehr schwer. Sie schwanken zwischen einem Beruf mit Tieren (bspw. Tierpflegerin, Tiermedizin) oder einer Tätigkeit im sozialen Bereich (bspw. Lehramtsstudium). Sie fühlen sich orientierungslos und haben den Eindruck, zu nichts zu taugen. Sie sind niedergeschlagen und deprimiert. Sie machen sich große Sorgen, den Anschluss zu verlieren und keine Perspektive zu finden. Am meisten belastet Sie das viele Grübeln um Ihre Zukunft. Diesbezüglich sind Sie hoffnungslos, überzeugt davon nicht genug Willenskraft zu haben und nichts Gutes zu verdienen.

**Emotionale Situation:** Seit etwa sechs Monaten fühlen Sie sich deprimiert und hoffnungslos. In Ihrem Kopf kreisen die Gedanken ständig darum, dass Sie unfähig sind sich um Ihre Zukunft zu kümmern. Es fehlt Ihnen jegliche Motivation sich weiterhin nach Jobs umzusehen. Treffen mit Freunden aus der Schulzeit erleben Sie als demotivierend, da diese inzwischen studieren oder eine Ausbildung machen. Sie sind überzeugt, dass Ihre Freunde und Ihre Eltern Sie inzwischen als Versagerin sehen, die nichts auf die Reihe bekommt. Sie wüssten, Sie könnten etwas an der Situation ändern, doch Sie fühlen sich der Situation hilflos ausgeliefert. Sie sind niedergeschlagen und antriebslos, es fällt Ihnen schwer, sich für alltägliche Aktivitäten wie Einkaufen oder Spaziergänge mit dem Hund zu motivieren.

**Soziale Situation:** Ihre Freunde, von denen einige noch in derselben Stadt wohnen, sehen Sie in den letzten Monaten immer seltener. Auch wenn Sie es ungern zugeben, haben Sie nur wenig Interesse an diesen Treffen. Sie haben den Eindruck, den Bezug zu Ihren Freunden zu verlieren. Sie wohnen mit Ihrer jüngeren Schwester noch bei Ihren Eltern. Ihre Mutter kümmert sich um Haushalt, Wäsche und Essen. Sie glauben, Ihren Eltern zur Last zu fallen. Gesprächen rund um Ihre Zukunft gehen Sie aus dem Weg, Sie ziehen sich häufig in Ihr Zimmer zurück.

**Tagesablauf:** Da Sie aktuell nicht arbeiten, haben Sie keinen festen Tagesablauf. Sie gehen meist erst spät schlafen, verbringen den Tag mit Fernsehen und Computerspielen. Manchmal helfen Sie Ihrer jüngeren Schwester bei den Hausaufgaben oder gehen mit dem Hund spazieren. Abends essen Sie mit Ihrer Familie, ziehen sich aber schnell wieder zurück.

## Hintergrundinformationen

**Jetzige Beschwerden:** Sie leiden unter dem ständigen Grübeln über Ihre Zukunft. Diese Gedanken tragen zu Ihrer gedrückten Stimmung bei. Sie können sich zu nichts mehr motivieren.

**Sozialanamnese:** Sie haben eine Schwester, die 14 Jahre alt ist. Ihre Eltern sind beide Ende 50 und noch berufstätig. Das familiäre Verhältnis ist gut, insbesondere mit Ihrer Schwester verstehen Sie sich gut. Nach dem Abitur letztes Jahr fehlt es Ihnen an Orientierung. Sie haben den Eindruck, Ihre Familie erwarte von Ihnen eine Entscheidung, wie Ihre Karriere verlaufen soll.

**Körperliche Anamnese:** Bisher keine ernsthaften körperlichen Erkrankungen. Keine Medikamente, kein Substanzgebrauch.

**Vorgeschichte:** Sie waren in Ihrem Leben bisher noch nie beim Psychotherapeuten oder Psychiater. Sie hatten noch nie eine psychische Erkrankung (keine Depression, keine Manien etc.). Sie leiden nicht unter Suizidalität.
